# Supplementary material for: Phylogenetic Characterization of Marine Benthic Archaea in Organic-Poor Sediments of the Eastern Equatorial Pacific Ocean (ODP Site 1225)
Source: MDPI journal article supplement (doi:10.3390/microorganisms4030032), 2016-09-06

## DGGE analysis

20%

visible bands  
sequenced

- 1 MBG-A1
- 2 MBG-A2
- 3

- 4 MG-1 unassigned
- 5 MG-1 unassigned
- 6

- 7 MG-1 unassigned
- 8 MG-1 α

1225-1C (0.1 mbsf)  
Arc 21F+GC 519R  
20-70% (6%), 250V, 2h

70%

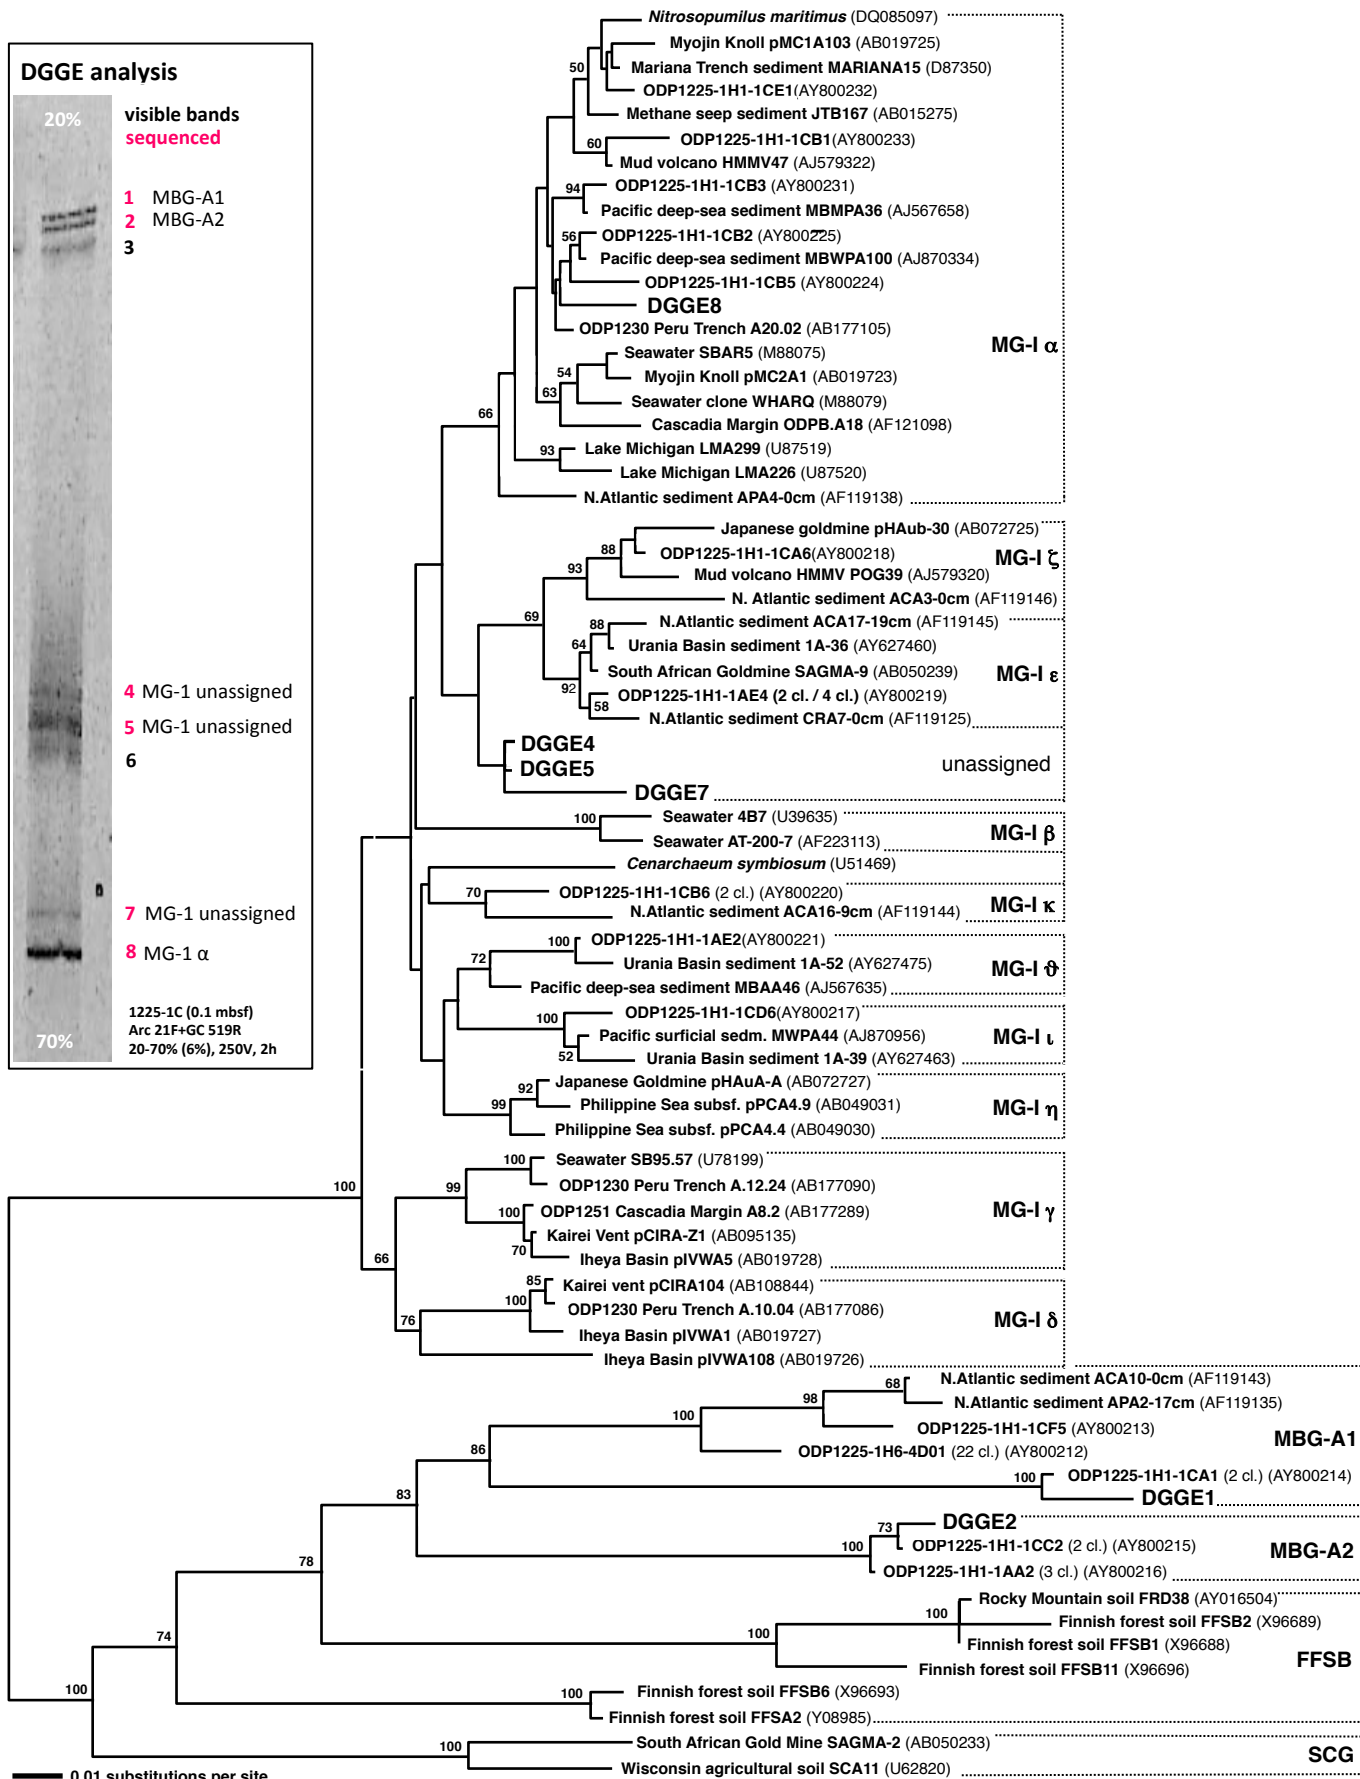

Supplement: s1 [file s1]
